# Supplementary material for: CREB3L2-mediated expression of Sec23A/Sec24D is involved in hepatic stellate cell activation through ER-Golgi transport
Source: PubMed Central journal article supplement (PMC5554210; doi:10.1038/s41598-017-08703-6), 2017-08-11
Supplement: 41598_2017_8703_MOESM1_ESM.pdf [file 41598_2017_8703_MOESM1_ESM.pdf]

## **Supplementary Information**

### **CREB3L2-mediated expression of Sec23A/Sec24D is involved in hepatic stellate cell activation through ER-Golgi transport**

Shotaro Tomoishi<sup>1</sup>, Shinichi Fukushima<sup>1</sup>, Kentaro Shinohara, Toshiaki Katada and Kota Saito\*

Department of Physiological Chemistry, Graduate School of Pharmaceutical Sciences, University of Tokyo, 7-3-1 Hongo, Bunkyo-ku, Tokyo 113-0033, Japan

\* Correspondence and requests for materials should be address to:  
K. S. (ksaito@mol.f.u-tokyo.ac.jp)

<sup>1</sup>These authors contributed equally to this work.

Toshiaki Katada' s present address: Faculty of Pharmacy, Musashino University, Tokyo 202-8585 Japan

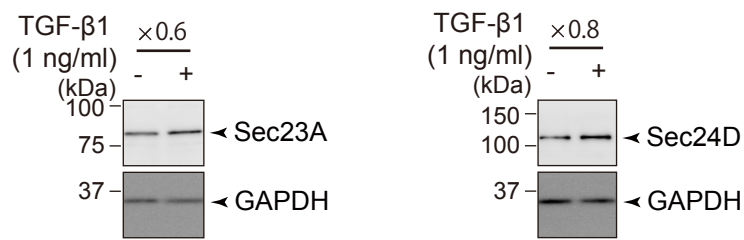

**Figure S1. Sec23A and Sec24D are upregulated in LX-2 cells upon TGF-β1 stimulation.**

The lysates used in Figure 2A were diluted as indicated and subjected to SDS-PAGE followed by western blotting with anti-Sec23A, anti-Sec24D and anti-GAPDH antibodies.

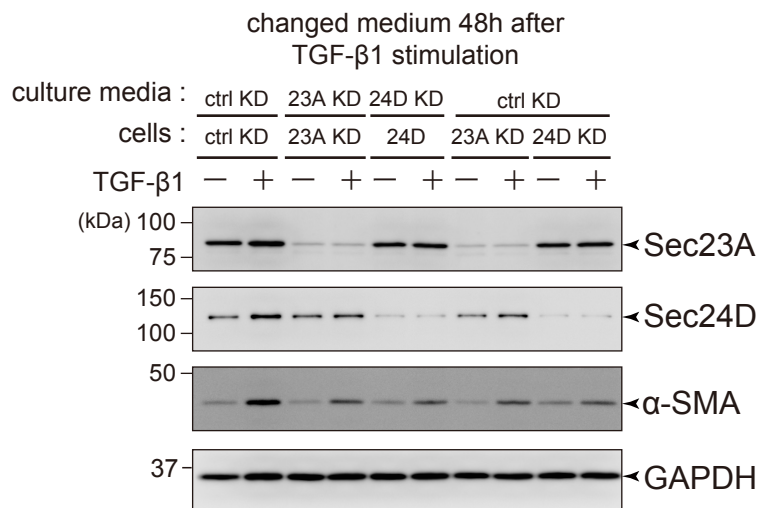

**Figure S2. Sec23A/Sec24D-mediated HSC activation does not depend on secreted factors.**

LX-2 cells transfected with the indicated siRNA(s) were cultured for 24 h in DMEM supplemented with 10% FBS. After starvation for 24 h with DMEM supplemented with 0.5% FBS, the cells were untreated or treated with 1 ng/ml TGF-β1 for 48 h. The culture medium was replaced with pre-cultured medium of cells treated with the indicated siRNA(s) and further cultured for 24 h. Proteins were extracted and subjected to SDS-PAGE, followed by western blotting with anti-Sec23A, anti-Sec24D, anti-α-SMA and anti-GAPDH antibodies. Shown are representative immunoblots (n = 3).

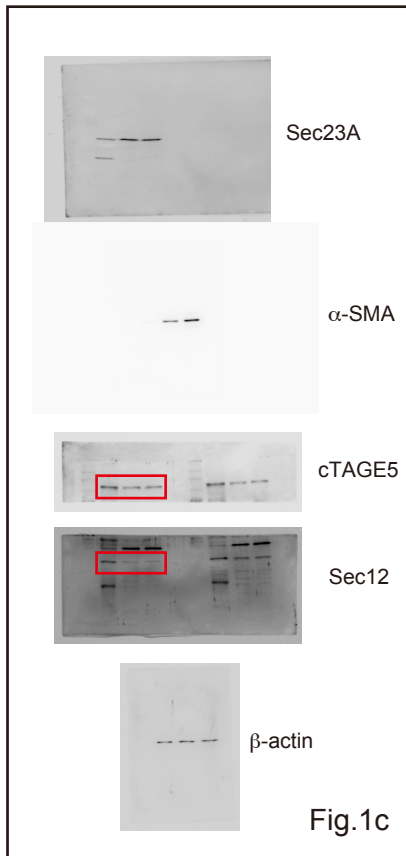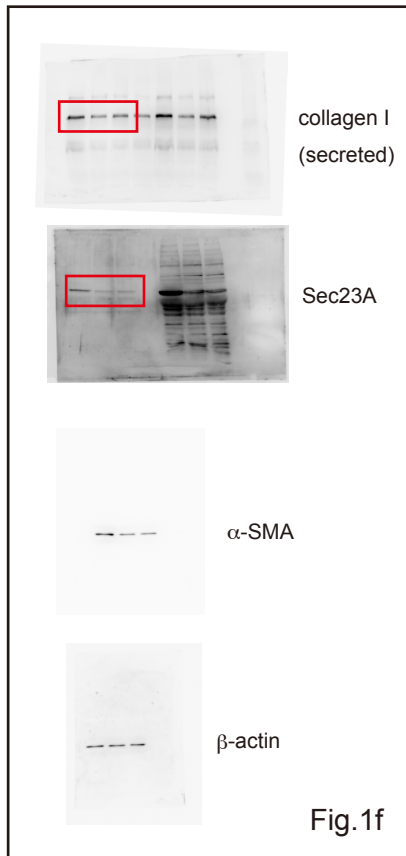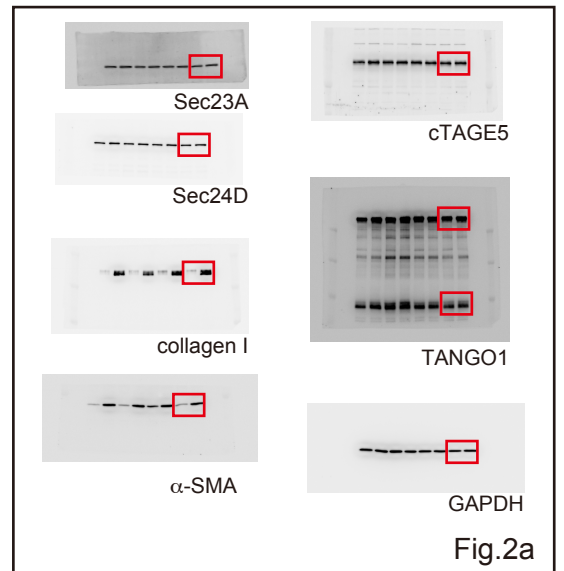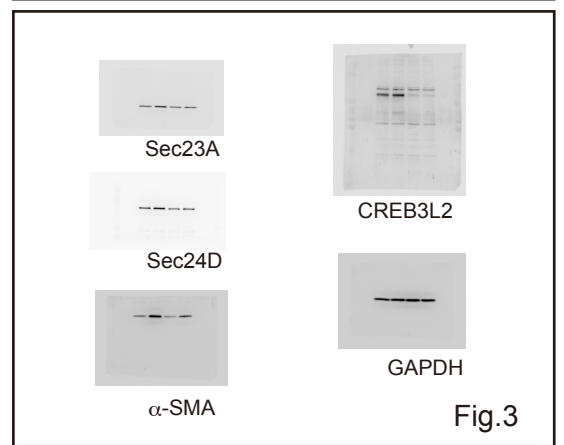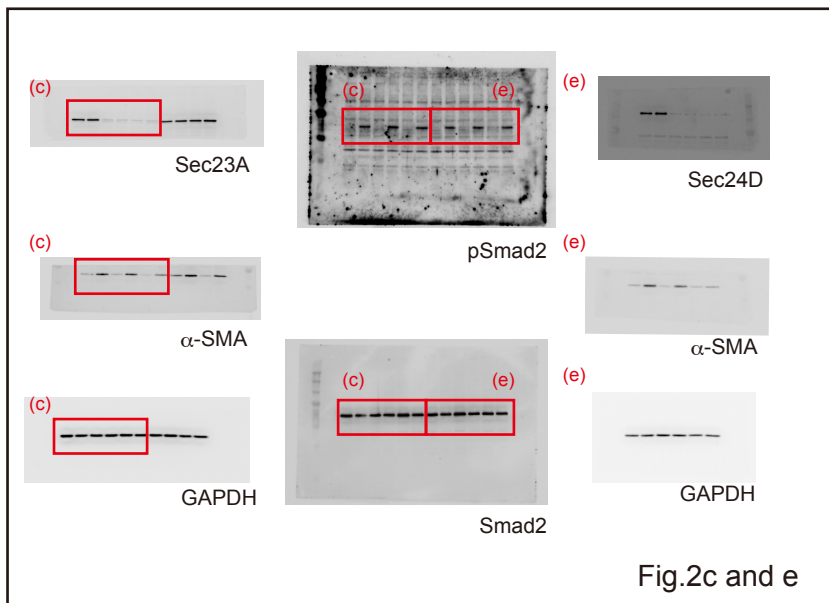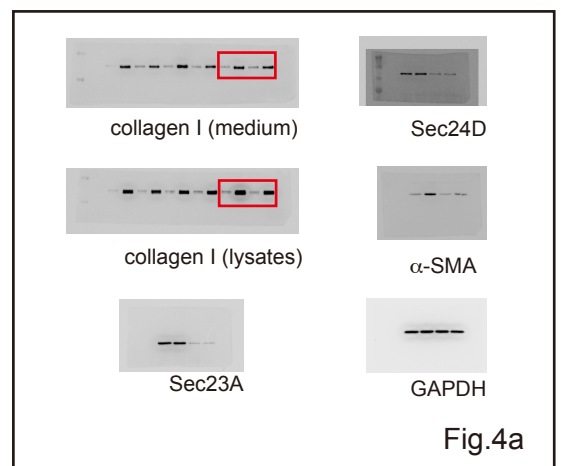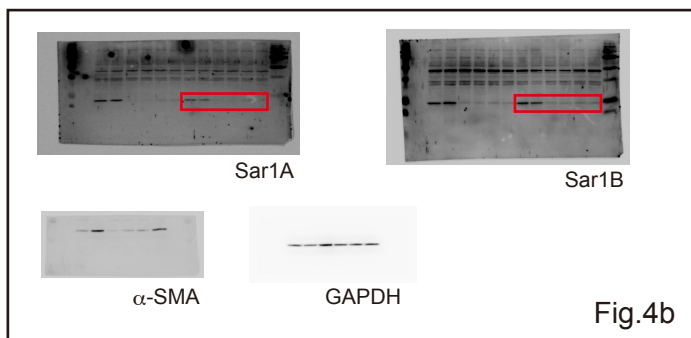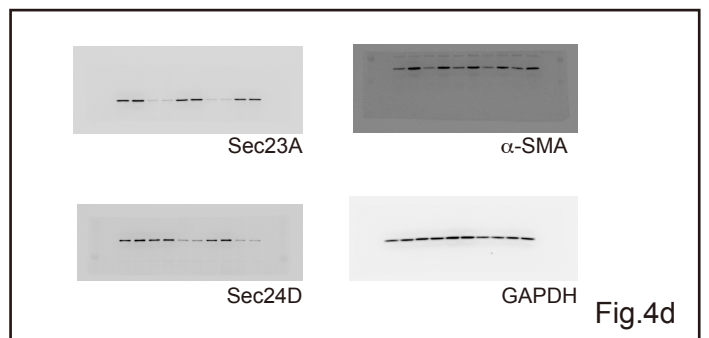

Figure S3. uncropped western blots.

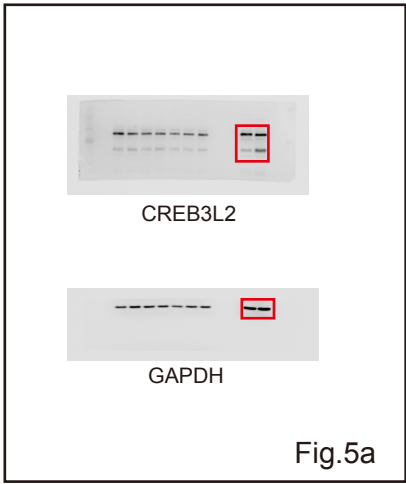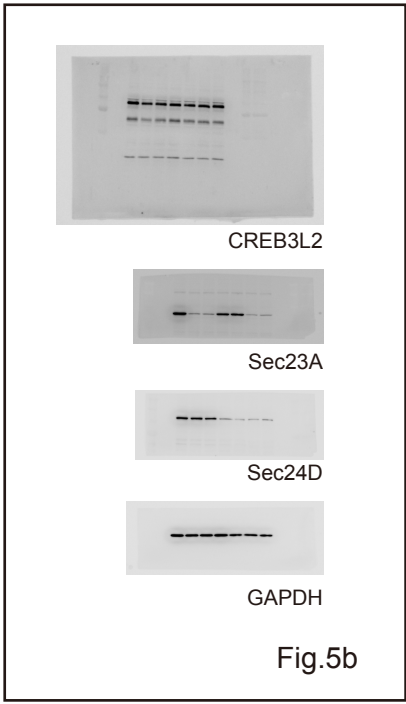

**Figure S3. uncropped western blots.**

## Rat

| Gene                     | RefSeq<br>accession number | Primers                    |                            |
|--------------------------|----------------------------|----------------------------|----------------------------|
|                          |                            | Sense                      | Antisense                  |
| $\beta$ -actin           | NM_031144                  | CCCGCGAGTACAACCTTCT        | CGTCATCCATGGCGAACT         |
| collagen I ( $\alpha$ 2) | NM_053356                  | CCTGGAGAACCTGGTCTCAT       | GGCCAACATTTCCAGGAG         |
| $\alpha$ -SMA            | NM_031004                  | TGCCATGTATGTGGCTATTCA      | ACCAGTTGTACGTCCAGAAGC      |
| TANGO1                   | XM_001064186               | AGCCGATGAAAAGGTGGTT        | TCAATTGCGCCGCTTGTAAGT      |
| ctage5                   | XM_006225775               | GGGACTTCCCTGGACCAC         | CCCTTGGTGCCTACACAGT        |
| Sar1A                    | NM_001007739               | GGGCAAACCACAGGAAAG         | CACTGCACATGAACACTTCCA      |
| Sar1B                    | NM_001009622               | CAGCACGTCCCAACTACA         | AAACGTCATGCCAGCAATAGT      |
| Sec12                    | NM_001170708               | TCGGATAGACCCCAAGACTG       | CACCCGCTGATCTGCTCTA        |
| Sec23A                   | NM_001105732               | GGAGATGAAGTGCTGCCCTA       | TTGAAAGAGTCACCCATTACCAT    |
| Sec23B                   | NM_001108593               | CTGGTCAACCTCAGGAGCA        | TCTTGTGAACGGGCTGTAGA       |
| Sec24A                   | NM_001105780               | GACAGTATTCCGATTTGGCTTC     | TGTGCTGATGGTGGTACGAG       |
| Sec24B                   | NM_001106474               | TCAGCTTCCGATGATGAGG        | GCGCTGCTTGTGGTAGAAG        |
| Sec24C                   | NM_001109456               | GCCTTGACGTTAGGAACGAA       | CATCCCCGATTTGATCTCAC       |
| Sec24D                   | XM_003749389               | GACCGTGCTGAAGAGGCTAC       | GAAACCAACTCGAATTGCAGA      |
| Sec13                    | NM_001006978               | GTGACTGGGTTTCGAGACGTT      | GGCGTCATCACAAGTCCAA        |
| Sec31                    | NM_033021                  | AGCCTGTCCCTCTGACACAC       | AACGTTGCCATGCATTATGA       |
| Bet3                     | NM_001008376               | TTTCGGGAAACTGCTGATG        | CCAGTTGGTGATGCTTGA         |
| CK1 $\delta$             | NM_139060                  | GGCTCCTTCGGAGACATCTA       | TGAGGATGTTTGGTTTTGACA      |
| PP6                      | NM_133589                  | CGCAGGTGTACGGATTTTATG      | TGAGCATGTCAAAAACCTTGGT     |
| p125                     | NM_001134859               | TGCTTGACTCTCTGAATCTTGAA    | CCGTGCCTAGAACCACATTC       |
| PCTAIRE                  | NM_031077                  | AGGGTCGCAATCGGATCT         | CCTTTAGTGCAAATATGGAAGTAGTG |
| USP10                    | NM_001034146               | GGTGGCAAGAGAGTCTGTCC       | GTCACTCTACGGCTGACTTCAA     |
| Dynactin1                | NM_024130                  | GCCAATCCCAGATCCAAG         | TTGAAGCAGAAGAATCAGGAG      |
| KLHL12                   | NM_153730                  | TATGGCCACCAAGCGTTC         | CCCACCACATAAATATGGTCATT    |
| Sedlin                   | NM_001024965               | GTCTGGAAGCTTCTACTTTGTAATTG | ACTGGTTCAGATGACGGTGA       |

**Table S1. Sequences of primers used in this study.**

## Rat

| siRNA         | sequence             |
|---------------|----------------------|
| Sec23A (2138) | CCCGCGAGTACAACCTTCT  |
| Sec23A (1358) | CCTGGAGAACCTGGTCTCAT |

## Human

| siRNA         | sequence                  |
|---------------|---------------------------|
| Sec23A (1119) | GGGUGAUUCUUUCAAUACUCCUUA  |
| Sec23A (366)  | GCGUGGUCCUCAGAUGCCUUUGAUA |
| Sec24D (827)  | GAGCCAGCAGAGGAGGACAAGUUUA |
| Sec24D (2597) | GAGCAUACCAGAGACAGCUGGUCAU |
| CREB3L2       | GAGUCUUGUUCAACUGAGATT     |
| Sar1A (150)   | GGCCAACAUGUCCAACACUACAU   |
| Sar1A (269)   | UCCAGCAAUJAAUGGGAUUGUCUU  |
| Sar1B (162)   | CCCAACAUUACAUCCCACUCCGAA  |
| Sar1B (495)   | GAAAGAACUGAAUGCCCGACCCUUA |

**Table S2. Sequences of siRNAs used in this study.**
